# Supplementary material
Source: MDPI journal article supplement (https://www.mdpi.com/2673-9496/2/2/5)
Supplement: s1 [file s1]

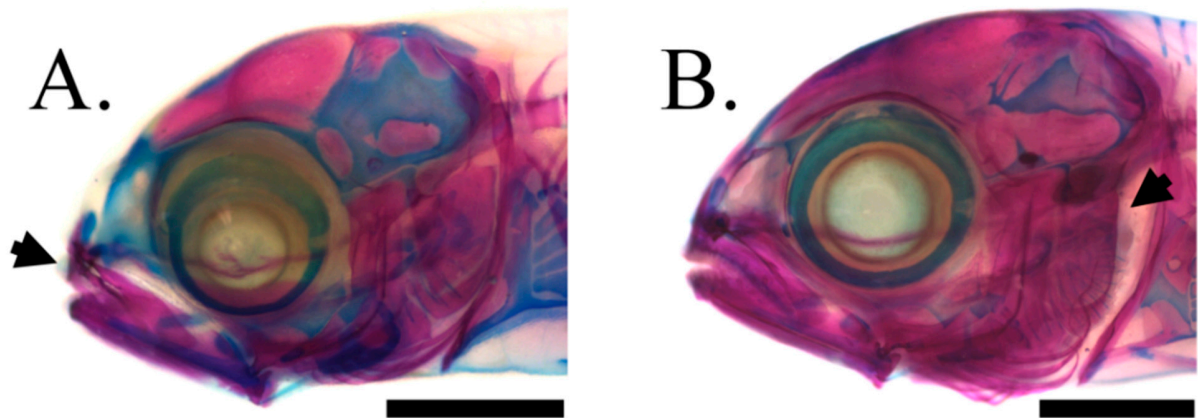

**Figure S2:** Main skeletal abnormalities developed in the experimental populations of gilthead sea bream. (A) Light fusion between maxillary and pre-maxillary bones. (B) Inside folding of the gill cover. Samples were stained for bone and cartilage [50]. Scale bars equal to 1 mm.
