# Supplementary material
Source: MDPI journal article supplement (https://www.mdpi.com/2673-9496/2/2/5)
Supplement: s1 [file s1]

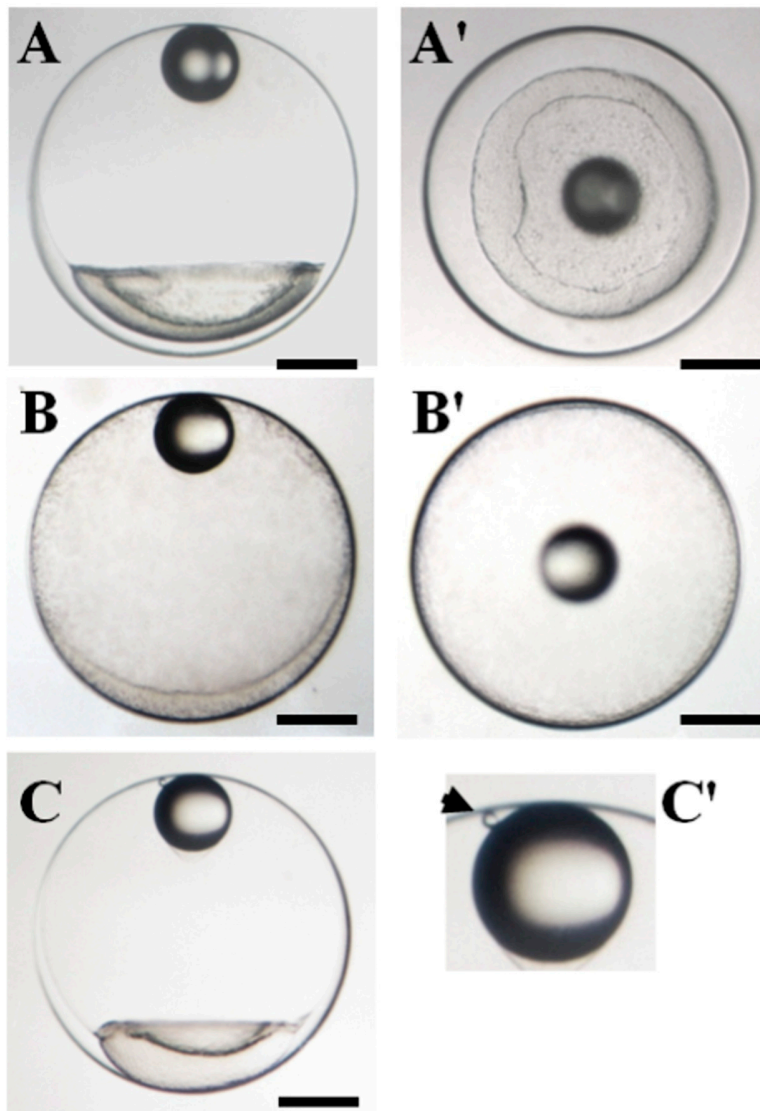

**Figure S1:** Embryos and unfertilized eggs of gilthead seabream. A, A', lateral and top view of a normal embryo at the epiboly onset. B, B'. lateral and top view of an unfertilized egg. C, C', embryo at the stage of blastodisc formation presenting an additional small droplet near the lipid globule (arrow in C'). Scale bars equal to 0.25 mm.
