# Supplementary material
Source: MDPI journal article supplement (https://www.mdpi.com/2673-9496/2/2/5)
Supplement: s1 [file s1]

**Table S1.** Complete name (1<sup>st</sup> column of the table, Genes), GenBank accession number, amplicon length (Amp.), annealing temperature (T) and primers sequences (forward and reverse sequence) used for real-time qPCR of total RNA obtained from the eggs of gilthead sea bream.

| <b>Genes</b>                       | <b>GenBank</b> | <b>Amp</b> | <b>T(°C)</b> | <b>Forward sequence</b> | <b>Reverse sequence</b> |
|------------------------------------|----------------|------------|--------------|-------------------------|-------------------------|
| <i>beta-actin</i>                  | AY 362763      | 232        | 60           | CCATGTACCCCGGCATCGCC    | AGGCCAGGATGGAGGCTCCG    |
| <i>glucocorticoid<br/>receptor</i> | DQ 486890.1    | 200        | 60           | GATCACGCCTTTGAGCACAT    | AAATTCTGAGGGGGACCCAG    |
| <i>cathepsin D</i>                 | AF 036319.1    | 164        | 59           | GCAGTTTGGTGAAGCTGTGA    | GTCAAACACCGGAACGACAT    |
| <i>cathepsin Z</i>                 | XM 030420146.1 | 291        | 58           | GGAGACCCAATCGTCCCCAA    | GGCACTGAACGTGACCTGA     |
| <i>cyclin-A2</i>                   | XM 030427065.1 | 190        | 58           | ATCGCAGCAGTCCCAACC      | GCAGCCTGACATCACCAAC     |
